# Supplementary material for: Leaf Soluble Sugars and Free Amino Acids as Important Components of Abscisic Acid—Mediated Drought Response in Tomato
Source: PubMed Central journal article supplement (PMC7570426; doi:10.3390/plants9091147), 2020-09-04
Supplement: plants-09-01147-s001.pdf [file plants-09-01147-s001.pdf]

**Supplementary Table S1.** Statistical analysis of the results (two-way ANOVA) to test the influence of the treatment (drought – D or rewatering – R) and two genotypes (WT and *flacca*) and their interactions on the amount of ABA, stomatal conductance and relative water potential in tomato leaves.

| <b>Trait</b>             | Source of variation  | df | F      | <i>p</i> | <b>Trait</b>             | Source of variation  | df | F     | <i>p</i> |
|--------------------------|----------------------|----|--------|----------|--------------------------|----------------------|----|-------|----------|
| <b>ABA (D)</b>           | Genotype             | 1  | 21.31  | 0.000110 | <b>ABA (R)</b>           | Genotype             | 1  | 41.65 | 0.000003 |
|                          | Treatment            | 1  | 20.37  | 0.000143 |                          | Treatment            | 1  | 10.13 | 0.004671 |
|                          | Genotype x Treatment | 1  | 2.53   | 0.125117 |                          | Genotype x Treatment | 1  | 2.54  | 0.126837 |
| <b>g<sub>s</sub> (D)</b> | Genotype             | 1  | 238.13 | 0.000000 | <b>g<sub>s</sub> (R)</b> | Genotype             | 1  | 5.88  | 0.027575 |
|                          | Treatment            | 1  | 72.62  | 0.000000 |                          | Treatment            | 1  | 16.61 | 0.000882 |
|                          | Genotype x Treatment | 1  | 13.99  | 0.000638 |                          | Genotype x Treatment | 1  | 11.18 | 0.004127 |
| <b>ψ(D)</b>              | Genotype             | 1  | 46.30  | 0.000004 | <b>ψ(R)</b>              | Genotype             | 1  | 7.30  | 0.019243 |
|                          | Treatment            | 1  | 35.80  | 0.000019 |                          | Treatment            | 1  | 0.53  | 0.481897 |
|                          | Genotype x Treatment | 1  | 34.24  | 0.000025 |                          | Genotype x Treatment | 1  | 4.55  | 0.054340 |

**Supplementary Table S2.** Statistical analysis of the results (two-way ANOVA) to test the influence of the treatment (drought – D or re-watering – R) and two genotypes (WT and *flacca*) and their interactions on the fresh and dry weight and leaf area in tomato leaves.

| Trait                   | Source of variation  | df | F     | <i>p</i> | Trait                   | Source of variation  | df | F      | <i>p</i> |
|-------------------------|----------------------|----|-------|----------|-------------------------|----------------------|----|--------|----------|
| <b>Fresh weight (D)</b> | Genotype             | 1  | 91.05 | 0.000001 | <b>Fresh weight (R)</b> | Genotype             | 1  | 610.92 | 0.000000 |
|                         | Treatment            | 1  | 0.59  | 0.458391 |                         | Treatment            | 1  | 9.76   | 0.008777 |
|                         | Genotype x Treatment | 1  | 5.08  | 0.043763 |                         | Genotype x Treatment | 1  | 0.29   | 0.600238 |
| <b>Dry weight (D)</b>   | Genotype             | 1  | 36.72 | 0.000057 | <b>Dry weight (R)</b>   | Genotype             | 1  | 38.63  | 0.000045 |
|                         | Treatment            | 1  | 7.10  | 0.020645 |                         | Treatment            | 1  | 0.69   | 0.422220 |
|                         | Genotype x Treatment | 1  | 0.82  | 0.382027 |                         | Genotype x Treatment | 1  | 0.02   | 0.882670 |
| <b>Leaf area (D)</b>    | Genotype             | 1  | 91.05 | 0.000001 | <b>Leaf area (R)</b>    | Genotype             | 1  | 140.67 | 0.000000 |
|                         | Treatment            | 1  | 0.59  | 0.458391 |                         | Treatment            | 1  | 0.91   | 0.358278 |
|                         | Genotype x Treatment | 1  | 5.08  | 0.043763 |                         | Genotype x Treatment | 1  | 0.29   | 0.600880 |

**Supplementary Table S3.** Content of soluble sugars in the leaves of WT and *flacca* tomato genotypes subjected to six-day water deficit (D) period followed by six-day period of re-watering (R). Respective controls corresponding to water-deficit condition (C<sub>D</sub>) and re-watering (C<sub>R</sub>) are presented. Values are presented as means ± SE (n = 4). Different letters denote significant differences between means according to Tukey HSD post hoc test  $p \leq 0.05$ . Small letters represent the differences in means of drought treatment, while caps letters represent re-watering treatment.

|                                                  | WT                              |                                 | <i>Flacca</i>                   |                                 | WT                              |                                 | <i>flacca</i>                   |                                 |
|--------------------------------------------------|---------------------------------|---------------------------------|---------------------------------|---------------------------------|---------------------------------|---------------------------------|---------------------------------|---------------------------------|
|                                                  | C <sub>D</sub>                  | D                               | C <sub>D</sub>                  | D                               | C <sub>R</sub>                  | R                               | C <sub>R</sub>                  | R                               |
| <i>Hexose (μmol g<sup>-1</sup> FW)</i>           |                                 |                                 |                                 |                                 |                                 |                                 |                                 |                                 |
| Glucose                                          | 12.38 ± 0.95 <sup>a</sup>       | 12.60 ± 0.38 <sup>a</sup>       | 13.16 ± 0.73 <sup>a</sup>       | 19.94 ± 2.19 <sup>b</sup>       | 12.61 ± 0.83 <sup>AB</sup>      | 11.04 ± 0.30 <sup>B</sup>       | 17.76 ± 1.65 <sup>C</sup>       | 15.79 ± 0.46 <sup>BC</sup>      |
| Fructose                                         | 8.65 ± 0.50 <sup>a</sup>        | 7.78 ± 0.93 <sup>a</sup>        | 7.83 ± 0.35 <sup>a</sup>        | 9.01 ± 0.91 <sup>a</sup>        | 8.35 ± 0.52 <sup>A</sup>        | 8.47 ± 0.19 <sup>A</sup>        | 11.70 ± 0.91 <sup>AB</sup>      | 15.27 ± 1.46 <sup>B</sup>       |
| Galactose                                        | 0.25 ± 0.02 <sup>a</sup>        | 0.48 ± 0.09 <sup>b</sup>        | 1.38 ± 0.06 <sup>c</sup>        | 1.24 ± 0.18 <sup>c</sup>        | 0.26 ± 0.03 <sup>A</sup>        | 0.53 ± 0.11 <sup>AB</sup>       | 0.96 ± 0.08 <sup>B</sup>        | 1.61 ± 0.17 <sup>C</sup>        |
| <i>Pentose (μmol g<sup>-1</sup> FW)</i>          |                                 |                                 |                                 |                                 |                                 |                                 |                                 |                                 |
| Arabinose                                        | 0.15 ± 0.01 <sup>a</sup>        | 0.39 ± 0.06 <sup>b</sup>        | 0.79 ± 0.17 <sup>c</sup>        | 0.73 ± 0.07 <sup>c</sup>        | 0.08 ± 0.01 <sup>A</sup>        | 0.34 ± 0.08 <sup>B</sup>        | 0.78 ± 0.03 <sup>C</sup>        | 0.95 ± 0.09 <sup>C</sup>        |
| Rhamnose                                         | 0.07 ± 0.01 <sup>b</sup>        | 0.08 ± 0.01 <sup>a</sup>        | 0.06 ± 0.01 <sup>b</sup>        | 0.08 ± 0.01 <sup>b</sup>        | 0.10 ± 0.01 <sup>B</sup>        | 0.07 ± 0.01 <sup>A</sup>        | 0.13 ± 0.01 <sup>C</sup>        | 0.13 ± 0.01 <sup>C</sup>        |
| Xylose                                           | 0.49 ± 0.01 <sup>a</sup>        | 0.53 ± 0.04 <sup>a</sup>        | 0.69 ± 0.02 <sup>b</sup>        | 0.39 ± 0.07 <sup>a</sup>        | 0.50 ± 0.02 <sup>A</sup>        | 1.29 ± 0.08 <sup>C</sup>        | 0.69 ± 0.02 <sup>AB</sup>       | 0.81 ± 0.08 <sup>B</sup>        |
| <i>Disaccharides (μmol g<sup>-1</sup> FW)</i>    |                                 |                                 |                                 |                                 |                                 |                                 |                                 |                                 |
| Sucrose                                          | 0.69 ± 0.10 <sup>bc</sup>       | 0.41 ± 0.04 <sup>a</sup>        | 0.63 ± 0.04 <sup>b</sup>        | 0.78 ± 0.03 <sup>c</sup>        | 0.39 ± 0.06 <sup>AB</sup>       | 0.73 ± 0.06 <sup>C</sup>        | 0.32 ± 0.01 <sup>A</sup>        | 0.50 ± 0.04 <sup>B</sup>        |
| Trehalose                                        | 0.08 ± 0.01 <sup>a</sup>        | 0.26 ± 0.04 <sup>b</sup>        | 0.02 ± 0.01 <sup>a</sup>        | 0.03 ± 0.01 <sup>a</sup>        | 0.13 ± 0.01 <sup>B</sup>        | 0.12 ± 0.02 <sup>B</sup>        | 0.03 ± 0.01 <sup>A</sup>        | 0.03 ± 0.01 <sup>A</sup>        |
| Melibiose                                        | 0.24 ± 0.01 <sup>b</sup>        | 0.24 ± 0.02 <sup>b</sup>        | 0.11 ± 0.01 <sup>a</sup>        | 0.11 ± 0.01 <sup>a</sup>        | 0.23 ± 0.18 <sup>B</sup>        | 0.49 ± 0.01 <sup>C</sup>        | 0.14 ± 0.01 <sup>A</sup>        | 0.15 ± 0.01 <sup>A</sup>        |
| Maltose                                          | 0.19 ± 0.02 <sup>bc</sup>       | 0.23 ± 0.02 <sup>c</sup>        | 0.13 ± 0.01 <sup>a</sup>        | 0.14 ± 0.01 <sup>ab</sup>       | 0.20 ± 0.02 <sup>BC</sup>       | 0.26 ± 0.04 <sup>C</sup>        | 0.11 ± 0.01 <sup>A</sup>        | 0.14 ± 0.01 <sup>AB</sup>       |
| <i>Oligosaccharides (nmol g<sup>-1</sup> FW)</i> |                                 |                                 |                                 |                                 |                                 |                                 |                                 |                                 |
| Maltotriose                                      | 16.24 ± 2.22 <sup>a</sup>       | 21.46 ± 0.66 <sup>ab</sup>      | 21.81 ± 1.14 <sup>ab</sup>      | 24.48 ± 0.18 <sup>b</sup>       | 21.57 ± 1.06 <sup>AB</sup>      | 19.23 ± 0.76 <sup>A</sup>       | 23.23 ± 0.48 <sup>B</sup>       | 24.72 ± 1.16 <sup>B</sup>       |
| Raffinose                                        | 43.28 ± 1.83 <sup>b</sup>       | 44.34 ± 1.91 <sup>b</sup>       | 31.03 ± 0.26 <sup>a</sup>       | 31.04 ± 0.39 <sup>a</sup>       | 47.38 ± 2.97 <sup>BC</sup>      | 54.91 ± 0.49 <sup>C</sup>       | 38.81 ± 0.54 <sup>A</sup>       | 39.69 ± 0.61 <sup>AB</sup>      |
| Panose                                           | 13.44 ± 0.15 <sup>a</sup>       | 17.45 ± 3.44 <sup>a</sup>       | 12.44 ± 0.49 <sup>a</sup>       | 15.87 ± 1.44 <sup>a</sup>       | 18.32 ± 1.82 <sup>A</sup>       | 22.15 ± 0.56 <sup>A</sup>       | 40.87 ± 0.39 <sup>B</sup>       | 39.71 ± 1.27 <sup>B</sup>       |
| Stachyose                                        | 12.33 ± 1.26 <sup>ab</sup>      | 12.98 ± 1.41 <sup>b</sup>       | 9.75 ± 0.43 <sup>ab</sup>       | 9.15 ± 0.27 <sup>a</sup>        | 16.29 ± 1.78 <sup>AB</sup>      | 19.27 ± 0.43 <sup>B</sup>       | 14.27 ± 0.59 <sup>A</sup>       | 14.93 ± 0.56 <sup>AB</sup>      |
| <i>Sugar alcohols (μmol g<sup>-1</sup> FW)</i>   |                                 |                                 |                                 |                                 |                                 |                                 |                                 |                                 |
| Sorbitol                                         | 1.03 ± 0.08 <sup>a</sup>        | 1.65 ± 0.13 <sup>b</sup>        | 4.16 ± 0.14 <sup>c</sup>        | 5.58 ± 0.71 <sup>c</sup>        | 1.69 ± 0.17 <sup>A</sup>        | 1.64 ± 0.20 <sup>A</sup>        | 5.87 ± 0.13 <sup>B</sup>        | 5.83 ± 0.58 <sup>B</sup>        |
| <b>Total SS (μmol g<sup>-1</sup> FW)</b>         | <b>24.31 ± 0.75<sup>a</sup></b> | <b>24.74 ± 1.04<sup>a</sup></b> | <b>29.04 ± 1.14<sup>a</sup></b> | <b>38.11 ± 3.97<sup>b</sup></b> | <b>24.64 ± 0.89<sup>A</sup></b> | <b>25.10 ± 0.64<sup>A</sup></b> | <b>38.61 ± 0.85<sup>B</sup></b> | <b>41.33 ± 1.72<sup>B</sup></b> |



|                     |                      |   |        |          |                     |                      |   |        |          |
|---------------------|----------------------|---|--------|----------|---------------------|----------------------|---|--------|----------|
| <b>Raf (D)</b>      | Genotype             | 1 | 46.39  | 0.000019 | <b>Raf (R)</b>      | Genotype             | 1 | 37.93  | 0.000049 |
|                     | Treatment            | 1 | 4.93   | 0.046462 |                     | Treatment            | 1 | 3.86   | 0.073062 |
|                     | Genotype x Treatment | 1 | 2.87   | 0.116214 |                     | Genotype x Treatment | 1 | 2.16   | 0.167528 |
| <b>Pan (D)</b>      | Genotype             | 1 | 0.66   | 0.431195 | <b>Pan (R)</b>      | Genotype             | 1 | 297.36 | 0.000000 |
|                     | Treatment            | 1 | 2.79   | 0.120665 |                     | Treatment            | 1 | 1.32   | 0.273232 |
|                     | Genotype x Treatment | 1 | 0.11   | 0.747021 |                     | Genotype x Treatment | 1 | 4.62   | 0.052707 |
| <b>Stach (D)</b>    | Genotype             | 1 | 15.51  | 0.001969 | <b>Stach (R)</b>    | Genotype             | 1 | 7.59   | 0.017412 |
|                     | Treatment            | 1 | 0.03   | 0.866993 |                     | Treatment            | 1 | 2.37   | 0.149259 |
|                     | Genotype x Treatment | 1 | 0.15   | 0.702514 |                     | Genotype x Treatment | 1 | 0.89   | 0.364404 |
| <b>Sor (D)</b>      | Genotype             | 1 | 192.00 | 0.000000 | <b>Sor (R)</b>      | Genotype             | 1 | 166.03 | 0.000000 |
|                     | Treatment            | 1 | 15.54  | 0.001954 |                     | Treatment            | 1 | 0.08   | 0.782405 |
|                     | Genotype x Treatment | 1 | 1.22   | 0.291613 |                     | Genotype x Treatment | 1 | 0.01   | 0.935445 |
| <b>Total SS (D)</b> | Genotype             | 1 | 26.43  | 0.000245 | <b>Total SS (R)</b> | Genotype             | 1 | 186.31 | 0.000000 |
|                     | Treatment            | 1 | 7.05   | 0.021006 |                     | Treatment            | 1 | 2.04   | 0.179204 |
|                     | Genotype x Treatment | 1 | 5.88   | 0.032089 |                     | Genotype x Treatment | 1 | 1.07   | 0.320500 |

---

**Supplementary Table S5.** Content of free amino acids (AAs) ( $\mu\text{mol g}^{-1}$  FW) in the leaves of WT and *flacca* tomato genotypes subjected to six-day water deficit (D) period followed by six-day period of re-watering (R). Respective controls corresponding to water-deficit condition ( $C_D$ ) and re-watering ( $C_R$ ) are presented. Values are presented as means  $\pm$  SE ( $n = 4$ ). Different letters denote significant differences between means according to Tukey HSD post hoc test  $p \leq 0.05$ . Small letters represent the differences in means of drought treatment, while caps letters represent re-watering treatment.

|                 | WT                            |                               | <i>flacca</i>                 |                               | WT                           |                              | <i>flacca</i>                 |                               |
|-----------------|-------------------------------|-------------------------------|-------------------------------|-------------------------------|------------------------------|------------------------------|-------------------------------|-------------------------------|
|                 | $C_D$                         | D                             | $C_D$                         | D                             | $C_R$                        | R                            | $C_R$                         | R                             |
| Aspartate       | 1.48 $\pm$ 0.01 <sup>a</sup>  | 2.23 $\pm$ 0.09 <sup>c</sup>  | 2.75 $\pm$ 0.18 <sup>b</sup>  | 1.55 $\pm$ 0.06 <sup>a</sup>  | 1.32 $\pm$ 0.10 <sup>A</sup> | 1.41 $\pm$ 0.20 <sup>C</sup> | 3.58 $\pm$ 0.02 <sup>A</sup>  | 2.04 $\pm$ 0.07 <sup>B</sup>  |
| Glutamate       | 1.44 $\pm$ 0.01 <sup>a</sup>  | 2.57 $\pm$ 0.15 <sup>b</sup>  | 2.61 $\pm$ 0.22 <sup>b</sup>  | 3.60 $\pm$ 0.34 <sup>c</sup>  | 1.37 $\pm$ 0.08 <sup>A</sup> | 1.64 $\pm$ 0.12 <sup>C</sup> | 4.43 $\pm$ 0.50 <sup>AB</sup> | 2.20 $\pm$ 0.04 <sup>B</sup>  |
| Glutamine       | 0.56 $\pm$ 0.01 <sup>a</sup>  | 0.86 $\pm$ 0.06 <sup>b</sup>  | 1.33 $\pm$ 0.09 <sup>a</sup>  | 2.37 $\pm$ 0.20 <sup>c</sup>  | 0.73 $\pm$ 0.01 <sup>A</sup> | 0.83 $\pm$ 0.12 <sup>B</sup> | 2.15 $\pm$ 0.24 <sup>A</sup>  | 1.01 $\pm$ 0.02 <sup>A</sup>  |
| Serine          | 0.32 $\pm$ 0.01 <sup>a</sup>  | 0.56 $\pm$ 0.05 <sup>b</sup>  | 0.56 $\pm$ 0.05 <sup>b</sup>  | 0.77 $\pm$ 0.09 <sup>c</sup>  | 0.34 $\pm$ 0.03 <sup>A</sup> | 0.27 $\pm$ 0.02 <sup>C</sup> | 0.71 $\pm$ 0.05 <sup>A</sup>  | 0.53 $\pm$ 0.04 <sup>B</sup>  |
| Alanine         | 0.32 $\pm$ 0.03 <sup>a</sup>  | 0.43 $\pm$ 0.01 <sup>ab</sup> | 0.55 $\pm$ 0.08 <sup>bc</sup> | 0.67 $\pm$ 0.11 <sup>c</sup>  | 0.62 $\pm$ 0.04 <sup>B</sup> | 0.34 $\pm$ 0.01 <sup>A</sup> | 0.68 $\pm$ 0.05 <sup>B</sup>  | 0.39 $\pm$ 0.01 <sup>A</sup>  |
| Proline         | 0.27 $\pm$ 0.03 <sup>a</sup>  | 3.70 $\pm$ 0.81 <sup>a</sup>  | 0.35 $\pm$ 0.02 <sup>c</sup>  | 3.12 $\pm$ 0.24 <sup>b</sup>  | 0.22 $\pm$ 0.03 <sup>A</sup> | 0.26 $\pm$ 0.04 <sup>A</sup> | 0.32 $\pm$ 0.04 <sup>A</sup>  | 1.03 $\pm$ 0.15 <sup>B</sup>  |
| Threonine       | 0.26 $\pm$ 0.03 <sup>a</sup>  | 0.36 $\pm$ 0.03 <sup>ab</sup> | 0.32 $\pm$ 0.04 <sup>a</sup>  | 0.48 $\pm$ 0.07 <sup>b</sup>  | 0.25 $\pm$ 0.01 <sup>A</sup> | 0.26 $\pm$ 0.04 <sup>A</sup> | 0.51 $\pm$ 0.05 <sup>B</sup>  | 0.27 $\pm$ 0.01 <sup>A</sup>  |
| Arginine        | 0.21 $\pm$ 0.02 <sup>a</sup>  | 0.20 $\pm$ 0.01 <sup>a</sup>  | 0.32 $\pm$ 0.03 <sup>ab</sup> | 0.28 $\pm$ 0.05 <sup>b</sup>  | 0.31 $\pm$ 0.02 <sup>B</sup> | 0.15 $\pm$ 0.01 <sup>A</sup> | 0.25 $\pm$ 0.04 <sup>B</sup>  | 0.30 $\pm$ 0.03 <sup>B</sup>  |
| Glycine         | 0.16 $\pm$ 0.02 <sup>b</sup>  | 0.13 $\pm$ 0.02 <sup>b</sup>  | 0.18 $\pm$ 0.02 <sup>ab</sup> | 0.10 $\pm$ 0.01 <sup>a</sup>  | 0.27 $\pm$ 0.01 <sup>C</sup> | 0.18 $\pm$ 0.01 <sup>B</sup> | 0.23 $\pm$ 0.01 <sup>A</sup>  | 0.18 $\pm$ 0.01 <sup>A</sup>  |
| Lysine          | 0.13 $\pm$ 0.02 <sup>a</sup>  | 0.20 $\pm$ 0.02 <sup>a</sup>  | 0.31 $\pm$ 0.03 <sup>b</sup>  | 0.39 $\pm$ 0.02 <sup>c</sup>  | 0.22 $\pm$ 0.09 <sup>A</sup> | 0.19 $\pm$ 0.06 <sup>A</sup> | 0.42 $\pm$ 0.14 <sup>B</sup>  | 2.88 $\pm$ 0.87 <sup>C</sup>  |
| Leucine         | 0.12 $\pm$ 0.01 <sup>ab</sup> | 0.15 $\pm$ 0.06 <sup>bc</sup> | 0.19 $\pm$ 0.03 <sup>c</sup>  | 0.10 $\pm$ 0.01 <sup>a</sup>  | 0.22 $\pm$ 0.04 <sup>A</sup> | 0.16 $\pm$ 0.06 <sup>A</sup> | 0.25 $\pm$ 0.01 <sup>A</sup>  | 0.26 $\pm$ 0.07 <sup>A</sup>  |
| Tyrosine        | 0.12 $\pm$ 0.01 <sup>a</sup>  | 0.21 $\pm$ 0.06 <sup>b</sup>  | 0.29 $\pm$ 0.01 <sup>b</sup>  | 0.56 $\pm$ 0.02 <sup>c</sup>  | 0.23 $\pm$ 0.02 <sup>A</sup> | 0.24 $\pm$ 0.02 <sup>A</sup> | 0.55 $\pm$ 0.17 <sup>B</sup>  | 0.16 $\pm$ 0.01 <sup>A</sup>  |
| Phenylalanine   | 0.09 $\pm$ 0.01 <sup>a</sup>  | 0.12 $\pm$ 0.01 <sup>a</sup>  | 0.22 $\pm$ 0.01 <sup>c</sup>  | 0.15 $\pm$ 0.01 <sup>b</sup>  | 0.12 $\pm$ 0.01 <sup>A</sup> | 0.10 $\pm$ 0.01 <sup>A</sup> | 0.15 $\pm$ 0.02 <sup>B</sup>  | 0.17 $\pm$ 0.01 <sup>B</sup>  |
| Asparagine      | 0.07 $\pm$ 0.01 <sup>a</sup>  | 0.12 $\pm$ 0.01 <sup>b</sup>  | 0.16 $\pm$ 0.01 <sup>b</sup>  | 0.33 $\pm$ 0.03 <sup>c</sup>  | 0.10 $\pm$ 0.01 <sup>A</sup> | 0.12 $\pm$ 0.01 <sup>B</sup> | 0.37 $\pm$ 0.04 <sup>A</sup>  | 0.14 $\pm$ 0.01 <sup>A</sup>  |
| Valine          | 0.05 $\pm$ 0.01 <sup>a</sup>  | 0.09 $\pm$ 0.01 <sup>b</sup>  | 0.10 $\pm$ 0.01 <sup>b</sup>  | 0.17 $\pm$ 0.02 <sup>c</sup>  | 0.09 $\pm$ 0.01 <sup>A</sup> | 0.06 $\pm$ 0.01 <sup>A</sup> | 0.14 $\pm$ 0.02 <sup>A</sup>  | 0.08 $\pm$ 0.01 <sup>B</sup>  |
| Isoleucine      | 0.05 $\pm$ 0.01 <sup>b</sup>  | 0.02 $\pm$ 0.01 <sup>a</sup>  | 0.05 $\pm$ 0.01 <sup>b</sup>  | 0.10 $\pm$ 0.01 <sup>c</sup>  | 0.10 $\pm$ 0.01 <sup>A</sup> | 0.08 $\pm$ 0.02 <sup>A</sup> | 0.06 $\pm$ 0.01 <sup>A</sup>  | 0.08 $\pm$ 0.01 <sup>A</sup>  |
| Ornithine       | 0.02 $\pm$ 0.01 <sup>a</sup>  | 0.03 $\pm$ 0.01 <sup>b</sup>  | 0.03 $\pm$ 0.01 <sup>b</sup>  | 0.04 $\pm$ 0.01 <sup>c</sup>  | 0.02 $\pm$ 0.01 <sup>A</sup> | 0.02 $\pm$ 0.01 <sup>A</sup> | 0.03 $\pm$ 0.01 <sup>A</sup>  | 0.03 $\pm$ 0.01 <sup>A</sup>  |
| <b>Total AA</b> | 5.64 $\pm$ 0.11 <sup>a</sup>  | 11.98 $\pm$ 0.68 <sup>b</sup> | 10.32 $\pm$ 0.71 <sup>b</sup> | 14.76 $\pm$ 0.65 <sup>c</sup> | 6.45 $\pm$ 0.17 <sup>A</sup> | 6.31 $\pm$ 0.38 <sup>A</sup> | 14.83 $\pm$ 1.21 <sup>C</sup> | 11.75 $\pm$ 0.75 <sup>B</sup> |

**Supplementary Table S6.** Statistical analysis of the results (two-way ANOVA) to test the influence of the treatment (drought – D or re-watering – R) and two genotypes (WT and *flacca*) and their interactions on the free amino acids content. Abbreviations: Aspartate – Asp, Glutamate – Glu, Glutamine – Gln, Serine – Ser, Alanine – Ala, Proline – Pro, Treonine – Tre, Arginine – Arg, Glycine – Gly, Lysine – Lys, Leucine – Leu, Tyrosine – Tyr, Phenilalanine – Phe, Asparagine – Asp, Valine – Val, Isoleucine – Ile, Ornithine – Orn.

| Trait          | Source of variation  | df | F       | <i>p</i> | Trait          | Source of variation  | df | F      | <i>p</i> |
|----------------|----------------------|----|---------|----------|----------------|----------------------|----|--------|----------|
| <b>Asp (D)</b> | Genotype             | 1  | 10.63   | 0.006818 | <b>Asp (R)</b> | Genotype             | 1  | 304.51 | 0.000000 |
|                | Treatment            | 1  | 6.15    | 0.029009 |                | Treatment            | 1  | 76.49  | 0.000001 |
|                | Genotype x Treatment | 1  | 115.92  | 0.000000 |                | Genotype x Treatment | 1  | 96.18  | 0.000000 |
| <b>Glu (D)</b> | Genotype             | 1  | 50.71   | 0.000012 | <b>Glu (R)</b> | Genotype             | 1  | 97.78  | 0.000000 |
|                | Treatment            | 1  | 46.58   | 0.000018 |                | Treatment            | 1  | 28.75  | 0.000170 |
|                | Genotype x Treatment | 1  | 0.22    | 0.646210 |                | Genotype x Treatment | 1  | 46.85  | 0.000018 |
| <b>Gln (D)</b> | Genotype             | 1  | 198.30  | 0.000000 | <b>Gln (R)</b> | Genotype             | 1  | 69.92  | 0.000002 |
|                | Treatment            | 1  | 67.37   | 0.000003 |                | Treatment            | 1  | 29.52  | 0.000152 |
|                | Genotype x Treatment | 1  | 20.48   | 0.000695 |                | Genotype x Treatment | 1  | 42.42  | 0.000029 |
| <b>Ser(D)</b>  | Genotype             | 1  | 29.07   | 0.000162 | <b>Ser (R)</b> | Genotype             | 1  | 151.51 | 0.000000 |
|                | Treatment            | 1  | 30.05   | 0.000140 |                | Treatment            | 1  | 25.64  | 0.000278 |
|                | Genotype x Treatment | 1  | 0.16    | 0.694734 |                | Genotype x Treatment | 1  | 4.55   | 0.054161 |
| <b>Ala (D)</b> | Genotype             | 1  | 22.38   | 0.000488 | <b>Ala (R)</b> | Genotype             | 1  | 5.57   | 0.036084 |
|                | Treatment            | 1  | 5.48    | 0.037267 |                | Treatment            | 1  | 141.91 | 0.000000 |
|                | Genotype x Treatment | 1  | 0.00    | 0.964919 |                | Genotype x Treatment | 1  | 0.00   | 0.970112 |
| <b>Pro (D)</b> | Genotype             | 1  | 7.39    | 0.018665 | <b>Pro (R)</b> | Genotype             | 1  | 61.14  | 0.000005 |
|                | Treatment            | 1  | 1803.36 | 0.000000 |                | Treatment            | 1  | 44.81  | 0.000022 |
|                | Genotype x Treatment | 1  | 14.67   | 0.002392 |                | Genotype x Treatment | 1  | 36.85  | 0.000056 |
| <b>Tre(D)</b>  | Genotype             | 1  | 6.18    | 0.028614 | <b>Tre (R)</b> | Genotype             | 1  | 43.77  | 0.000025 |
|                | Treatment            | 1  | 14.79   | 0.002329 |                | Treatment            | 1  | 29.42  | 0.000154 |
|                | Genotype x Treatment | 1  | 0.73    | 0.409787 |                | Genotype x Treatment | 1  | 33.44  | 0.000087 |
| <b>Arg (D)</b> | Genotype             | 1  | 16.95   | 0.001427 | <b>Arg (R)</b> | Genotype             | 1  | 5.47   | 0.037413 |
|                | Treatment            | 1  | 1.62    | 0.227618 |                | Treatment            | 1  | 6.44   | 0.026071 |
|                | Genotype x Treatment | 1  | 0.36    | 0.560661 |                | Genotype x Treatment | 1  | 24.15  | 0.000357 |
| <b>Gly (D)</b> | Genotype             | 1  | 0.04    | 0.842515 | <b>Gly (R)</b> | Genotype             | 1  | 11.53  | 0.005316 |
|                | Treatment            | 1  | 18.49   | 0.001032 |                | Treatment            | 1  | 175.49 | 0.000000 |
|                | Genotype x Treatment | 1  | 4.63    | 0.052375 |                | Genotype x Treatment | 1  | 16.39  | 0.001613 |
| <b>Lys (D)</b> | Genotype             | 1  | 105.22  | 0.000000 | <b>Lys (R)</b> | Genotype             | 1  | 11.37  | 0.005547 |
|                | Treatment            | 1  | 18.19   | 0.001098 |                | Treatment            | 1  | 1.9724 | 0.185546 |
|                | Genotype x Treatment | 1  | 0.13    | 0.727969 |                | Genotype x Treatment | 1  | 2.1866 | 0.164981 |

|                          |                      |   |        |          |                          |                      |   |        |          |
|--------------------------|----------------------|---|--------|----------|--------------------------|----------------------|---|--------|----------|
| <b>Leu (D)</b>           | Genotype             | 1 | 0.75   | 0.403964 | <b>Leu (R)</b>           | Genotype             | 1 | 0.75   | 0.403964 |
|                          | Treatment            | 1 | 4.75   | 0.049925 |                          | Treatment            | 1 | 4.75   | 0.049925 |
|                          | Genotype x Treatment | 1 | 34.90  | 0.000072 |                          | Genotype x Treatment | 1 | 34.90  | 0.000072 |
| <b>Tyr (D)</b>           | Genotype             | 1 | 155.71 | 0.000000 | <b>Tyr (R)</b>           | Genotype             | 1 | 3.57   | 0.083094 |
|                          | Treatment            | 1 | 73.46  | 0.000002 |                          | Treatment            | 1 | 9.49   | 0.009518 |
|                          | Genotype x Treatment | 1 | 17.89  | 0.001168 |                          | Genotype x Treatment | 1 | 10.83  | 0.006445 |
| <b>Phe (D)</b>           | Genotype             | 1 | 109.74 | 0.000000 | <b>Phe (R)</b>           | Genotype             | 1 | 48.31  | 0.000015 |
|                          | Treatment            | 1 | 6.81   | 0.022854 |                          | Treatment            | 1 | 0.38   | 0.550781 |
|                          | Genotype x Treatment | 1 | 38.40  | 0.000046 |                          | Genotype x Treatment | 1 | 7.20   | 0.019917 |
| <b>Asn (D)</b>           | Genotype             | 1 | 154.02 | 0.000000 | <b>Asn (R)</b>           | Genotype             | 1 | 85.79  | 0.000001 |
|                          | Treatment            | 1 | 93.75  | 0.000001 |                          | Treatment            | 1 | 41.27  | 0.000033 |
|                          | Genotype x Treatment | 1 | 25.79  | 0.000271 |                          | Genotype x Treatment | 1 | 62.77  | 0.000004 |
| <b>Val (D)</b>           | Genotype             | 1 | 53.35  | 0.000009 | <b>Val (R)</b>           | Genotype             | 1 | 22.46  | 0.000481 |
|                          | Treatment            | 1 | 40.17  | 0.000037 |                          | Treatment            | 1 | 27.58  | 0.000204 |
|                          | Genotype x Treatment | 1 | 2.44   | 0.144336 |                          | Genotype x Treatment | 1 | 5.78   | 0.033235 |
| <b>Ile (D)</b>           | Genotype             | 1 | 372.71 | 0.000000 | <b>Ile (R)</b>           | Genotype             | 1 | 3.27   | 0.095841 |
|                          | Treatment            | 1 | 31.64  | 0.000112 |                          | Treatment            | 1 | 0.01   | 0.908896 |
|                          | Genotype x Treatment | 1 | 245.33 | 0.000000 |                          | Genotype x Treatment | 1 | 4.27   | 0.061041 |
| <b>Orn (D)</b>           | Genotype             | 1 | 34.28  | 0.000078 | <b>Orn (R)</b>           | Genotype             | 1 | 8.95   | 0.011233 |
|                          | Treatment            | 1 | 22.21  | 0.000503 |                          | Treatment            | 1 | 0.27   | 0.615684 |
|                          | Genotype x Treatment | 1 | 0.25   | 0.626623 |                          | Genotype x Treatment | 1 | 0.53   | 0.481160 |
| <b>Gly/Ser ratio (D)</b> | Genotype             | 1 | 14.525 | 0.005154 | <b>Gly/Ser ratio (R)</b> | Genotype             | 1 | 172.77 | 0.000001 |
|                          | Treatment            | 1 | 44.578 | 0.000156 |                          | Treatment            | 1 | 4.12   | 0.076853 |
|                          | Genotype x Treatment | 1 | 0.902  | 0.370111 |                          | Genotype x Treatment | 1 | 8.05   | 0.021928 |
| <b>Total AA (D)</b>      | Genotype             | 1 | 39.68  | 0.000233 | <b>Total AA (R)</b>      | Genotype             | 1 | 55.94  | 0.000710 |
|                          | Treatment            | 1 | 83.05  | 0.000017 |                          | Treatment            | 1 | 5.87   | 0.041625 |
|                          | Genotype x Treatment | 1 | 2.58   | 0.146667 |                          | Genotype x Treatment | 1 | 4.83   | 0.059093 |

---
